# Supplementary material for: A full overview of international standards assessing the long-term stability of perovskite solar cells
Source: Royal Society of Chemistry journal article supplement (doi:10.1039/c8ta06950f), 2018-01-01
Supplement: c8ta06950f1.pdf [file c8ta06950f1.pdf]

## Supporting Information

A full overview of international standards assessing the long-term stability of perovskite solar cells

Philippe Holzhey, Michael Saliba\*

\*michael.saliba@unifr.ch, miliba@gmail.com

**Table S1** Summary of the reviewed standards for photovoltaics

| Designed for                     | Name                        |                                                                                            |
|----------------------------------|-----------------------------|--------------------------------------------------------------------------------------------|
| Terrestrial photovoltaic modules | IEC 61215-1 (Vers. 2016)    | Design qualification and type approval – Part 1: Test requirements                         |
| Crystalline silicon              | IEC 61215-1-1 (Vers. 2016)  | Special requirements for testing of crystalline silicon photovoltaic modules               |
| CdTe                             | IEC 61215-1-2 (Vers. 2016)  | Special requirements for testing of thin-film CdTe based photovoltaic modules              |
| Amorphous silicon                | IEC 61215-1-3 (Vers. 2016)  | Special requirements for testing of thin-film amorphous silicon based photovoltaic modules |
| CIGS                             | IEC 61215-1-4 (Vers. 2016)  | Special requirements for testing of thin-film CIGS based photovoltaic modules              |
| Crystalline solar cells          | IEC 61215-2 (Vers. 2016)    | Design qualification and type approval - Part:2 Test procedures                            |
| Photovoltaic modules             | IEC 62716 (Vers. 2013)      | Ammonia corrosion testing                                                                  |
| Crystalline silicon              | IEC TS 62804-1 (Vers. 2015) | Test methods for the detection of potential-induced degradation                            |

**Table S2** Summary of all test performed in the IEC 61215. Copyright © 2016 IEC Geneva, Switzerland. www.iec.ch

| <b>Test</b>                                                                            | <b>Conditions</b>                                                                                                                                                                                                                                                                                                                       |
|----------------------------------------------------------------------------------------|-----------------------------------------------------------------------------------------------------------------------------------------------------------------------------------------------------------------------------------------------------------------------------------------------------------------------------------------|
| <b>Visual inspection</b>                                                               | Visual inspection to detect any visual defects that may cause a risk loss, including power output.                                                                                                                                                                                                                                      |
| <b>Maximum power determination</b>                                                     | Measurement of I-V curves at a specific set of irradiance and temperature between 25 and 50 °C and an irradiance between 700 W/m <sup>2</sup> and 1100 W/m <sup>2</sup> using natural sunlight or a class BBA or better simulator                                                                                                       |
| <b>Insulation test</b>                                                                 | For modules with a system voltage greater than 50 V d.c., dielectric withstand at 1 000 V d.c. + twice the maximum systems voltage for 1 min, followed by insulation resistance measurement at 500 V d.c. or maximum systems voltage for 2 min. For modules with a system voltage less than 50 V d.c., the test voltages are 500 V d.c. |
| <b>Measurement of temperature coefficients</b>                                         | Temperature coefficients for the current ( $\alpha$ ), voltage ( $\beta$ ) and peak power ( $\delta$ ). See IEC 60891 for more Information and IEC 60904-10 for temperature coefficients at different irradiance levels.                                                                                                                |
| <b>Measurement of nominal module operating temperature</b>                             | Module operating near maximum power point<br>Total solar irradiance: 800 W/m <sup>2</sup><br>Ambient temperature: 20 °C<br>Wind speed: 1 m/s                                                                                                                                                                                            |
| <b>Performance at standard test condition and nominal module operating temperature</b> | Cell temperature of 25 °C at STC and module temperature at nominal module operating temperature<br>Irradiance: 1000 W/m <sup>2</sup> and 800 W/m <sup>2</sup> with IEC 60904-3 reference solar spectral irradiance distribution                                                                                                         |
| <b>Performance at low irradiance</b>                                                   | Cell temperature: 25 °C<br>Irradiance: 200 W/m <sup>2</sup> with IEC 60904-3 reference solar spectral distribution                                                                                                                                                                                                                      |
| <b>Outdoor exposure test</b>                                                           | 60 kWh/m <sup>2</sup>                                                                                                                                                                                                                                                                                                                   |
| <b>Hot-spot endurance test</b>                                                         | Exposure to 1000 W/m <sup>2</sup> irradiance in worst-case hot-spot condition                                                                                                                                                                                                                                                           |
| <b>UV preconditioning</b>                                                              | 15 kWh/m <sup>2</sup> total UV irradiation in the wavelength range from 280 nm to 400 nm with 3 % to 10 % UV irradiance in the wavelength range from 280 nm to 320 nm at 60 ± 5 °C                                                                                                                                                      |
| <b>Thermal cycling test</b>                                                            | 50 or 200 cycles from -40 °C to 85 °C with current as per technology specific part up to +80 °C                                                                                                                                                                                                                                         |
| <b>Humidity freeze test</b>                                                            | 10 cycles from 85 °C, 85 % RH to -40 °C with circuitry continuity monitoring                                                                                                                                                                                                                                                            |
| <b>Damp heat test</b>                                                                  | 1000 h at +85 °C, 85 % RH                                                                                                                                                                                                                                                                                                               |
| <b>Robustness of termination</b>                                                       | Test of junction box retention and cord anchorage                                                                                                                                                                                                                                                                                       |
| <b>Wet leakage current test</b>                                                        | Test voltage increase at a rate not exceeding 500 V/s to 500 V or the maximum system voltage for the module, whichever is greater. Maintain the voltage at the level for 1 min.                                                                                                                                                         |
| <b>Static mechanical load test</b>                                                     | Three cycles of uniform load specified by the manufacturer, applied for 1 h to front and back surfaces in turn.<br>Minimum test load: 2400 Pa                                                                                                                                                                                           |

|                                  |                                                                                                                                                                                         |
|----------------------------------|-----------------------------------------------------------------------------------------------------------------------------------------------------------------------------------------|
| <b>Hail test</b>                 | 25 mm diameter ice ball at 23,0 m/s, directed at 11 impact locations                                                                                                                    |
| <b>Bypass diode thermal test</b> | Bypass diode thermal test:<br>1 h at $I_{SC}$ and 75 °C<br>1 h at 1,25 times $I_{SC}$ and 75 °C<br>Bypass diode functionality test<br>At 25 °C perform voltage and current measurements |
| <b>Stabilization</b>             | Three consecutive maximum output power measurements P1, P2 and P3. Output power is determined under standard test conditions.                                                           |

**Table S3** Locations to be shoot with ice balls as described in the hail test. Some locations may require larger ice balls which are given in Table S4. Copyright © 2016 IEC Geneva, Switzerland. [www.iec.ch](http://www.iec.ch)

| <b>Shot No.</b> | <b>Location</b>                                                                                                                                  |
|-----------------|--------------------------------------------------------------------------------------------------------------------------------------------------|
| <b>1</b>        | Any corner of the module window, not more than one radius from the module edge.                                                                  |
| <b>2</b>        | Any edge of the module, not more than one radius from the module edge.                                                                           |
| <b>3, 4</b>     | Over the circuit near the interconnects (i.e. cell interconnects and bus ribbons).                                                               |
| <b>5, 6</b>     | Over edges of the circuit (e.g. individual cells).                                                                                               |
| <b>7, 8</b>     | On the module window, not more than half diameter of ice ball from one of the points at which the module is mounted to the supporting structure. |
| <b>9, 10</b>    | On the module window, at points farthest from the points selected above.                                                                         |
| <b>11</b>       | Any points which may prove especially vulnerable to hail impact like over the junction box.                                                      |

**Table S4** Ice ball size, masses, and velocity. Hail prone locations may require larger sizes therefore different sizes are given. Copyright © 2016 IEC Geneva, Switzerland. [www.iec.ch](http://www.iec.ch)

| <b>Diameter (mm)</b> | <b>Mass (g)</b> | <b>Test velocity (m/s)</b> |
|----------------------|-----------------|----------------------------|
| 25                   | 7.53            | 23.0                       |
| 35                   | 20.7            | 27.2                       |
| 45                   | 43.9            | 30.7                       |
| 55                   | 80.2            | 33.9                       |
| 65                   | 132.0           | 36.7                       |
| 75                   | 203.0           | 39.5                       |

### Supplementary Note 1 - Detailed IEC 61215 test

The degradation after each sequence shown in Figure 2 should not be more than 5% times a reproducibility factor that is technology specific. Following equation is used to determine stable modules:

$$P_{max}(after\ the\ test\ sequence) \geq 0.95 P_{max}(initial)(1 - r)$$

r is the reproducibility of the modules which is determined for each certification. r should be lower than 2% for amorphous silicon, CIGS, CdTe and lower than 1% for crystalline silicon. r is verified by comparing the control modules from sequence A after the initial and after the final stabilization, which is measured after completing all tests. If r exceeds the technology specific limit for the control module, the technology-specific limit for r is taken.

### References

- 1.R. Roesch, T. Faber, E. Von Hauff, T. M. Brown, M. Lira-Cantu and H. Hoppe, Procedures and practices for evaluating thin-film solar cell stability, *Adv. Energy Mater.* (2015).; DOI:10.1002/aenm.201501407
- 2.M. Köntges, S. Kurtz, C. E. Packard, U. Jahn, K. Berger, K. Kato, T. Friesen, H. Liu and M. Van Iseghem, *Review of Failures of Photovoltaic Modules, IEA-Photovoltaic Power Syst. Program.*; DOI:978-3-906042-16-9
- 3.M. O. Reese, S. A. Gevorgyan, M. Jørgensen, E. Bundgaard, S. R. Kurtz, D. S. Ginley, D. C. Olson, M. T. Lloyd, P. Morvillo, E. A. Katz, A. Elschner, O. Haillant, T. R. Currier, V. Shrotriya, M. Hermenau, M. Riede, K. R. Kirov, G. Trimmel, et al., Consensus stability testing protocols for organic photovoltaic materials and devices, *Sol. Energy Mater. Sol. Cells* (2011).; DOI:10.1016/j.solmat.2011.01.036
